# Supplementary material for: Impact of ITCZ width on global climate: ITCZ-MIP
Source: Copernicus journal article supplement (doi:10.5194/gmd-17-6365-2024), 2024-08-29
Supplement: Supplementary file [file gmd-17-6365-2024-supplement.pdf]

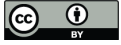

*Supplement of*

## **Impact of ITCZ width on global climate: ITCZ-MIP**

**Angeline G. Pendergrass et al.**

*Correspondence to:* Angeline G. Pendergrass (a.pendergrass@cornell.edu)

The copyright of individual parts of the supplement might differ from the article licence.

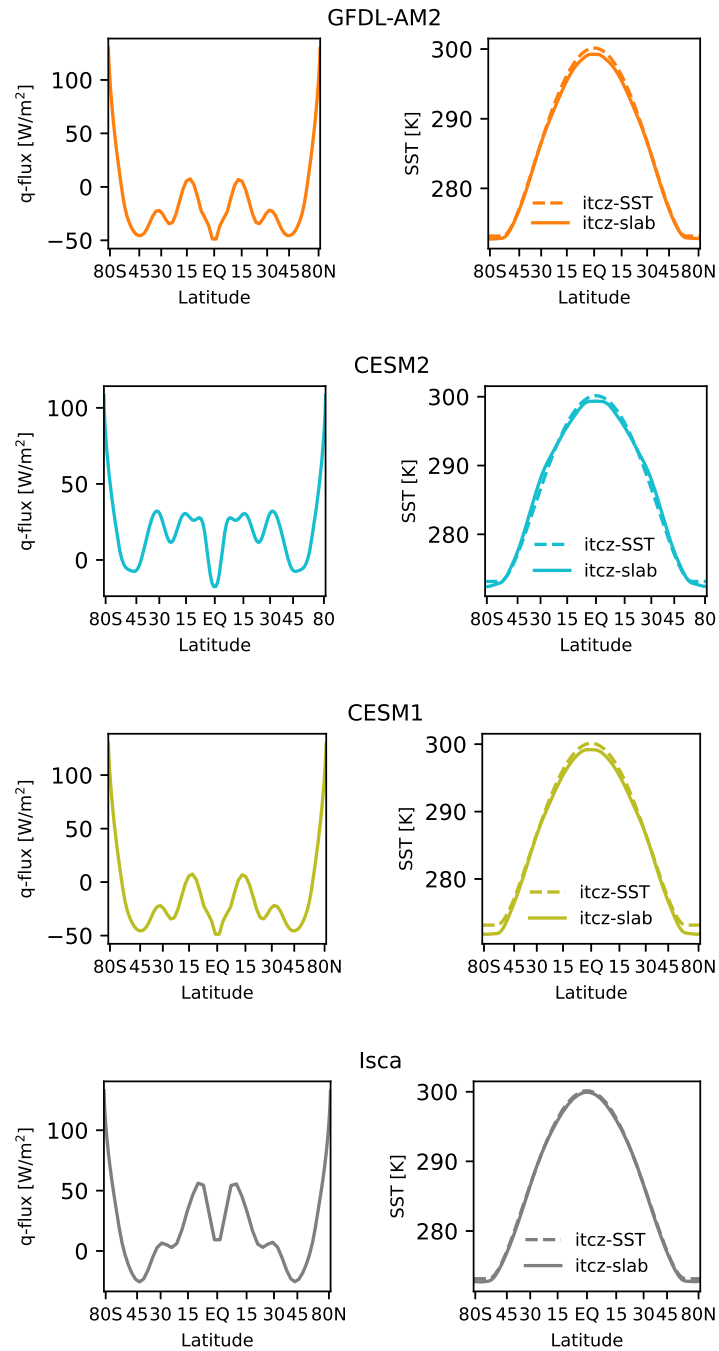

**Figure S1.** (left)  $Q$ -fluxes ( $F$  in Eq. 2) derived from the itcz-SST prescribed SST experiment and applied to the itcz-slab control experiment for each model. (right) CONTROL prescribed SSTs and SSTs from the slab ocean control experiment, itcz-slab.
